# Supplementary material
Source: publisher figshare collection journal article supplement (https://karger.figshare.com/articles/dataset/_/7498145)
Supplement: Supplementary file 4 [file 1]

**Supplemental Table 1.** Primers used for qPCR for cortical samples.

| Gene (Ensembl /No.Transcript ID)                    | Position | Sequence                  |
|-----------------------------------------------------|----------|---------------------------|
| <i>Er-<math>\alpha</math></i> (ENSRNOT00000081017)  | +2 F     | CACACACGCTCTGCCTTGA       |
|                                                     | +68 R    | GACGGAAGGAAGGAATGTGC      |
| <i>Er-<math>\beta</math></i> (ENSRNOT00000042682)   | +754 F   | ATCCAGGAGAGAACGGTGTGGGT   |
|                                                     | +825 R   | AGGCAGTGTACCTGCTCGCTAGAAC |
| <i>Err-<math>\gamma</math></i> (ENSRNOT00000003489) | +197 F   | GCGCACATGGATTCTGGTAGAA    |
|                                                     | +268 R   | GCAGAGAAGCTCTTCTTCGTAGTGC |
| <i>Ar</i> (ENSRNOT00000009129)                      | +2508 F  | GAAATGGGACCTTGGATGGAGA    |
|                                                     | +2585 R  | TAAAACGTGGTCCCTGGTACTGTC  |
| <i>Star</i> (ENSRNOT00000020606)                    | +686 F   | CTTTGGGGAGATGCCTGAGC      |
|                                                     | +765 R   | CAGCCAGTGGATGAAGCACC      |
| <i>Cyp11a1</i> (ENSRNOT00000010831)                 | +563 F   | TTACACAGACGCATCAAGCAGC    |
|                                                     | +638 R   | AGGCAAAGCGGAATAGGTCATC    |
| <i>Cat</i> (ENSRNOE00000078559)                     | +220 F   | TTGACAGAGAGCGGATTCCTGAGA  |
|                                                     | +297 R   | CGTGGGTGACCTCAAAGTATCCAA  |
| <i>Sod1</i> (ENSRNOT00000002885)                    | +239 F   | CAGCGGATGAAGAGAGGCA       |
|                                                     | +310 R   | ACACATTTGCCACACCGTCTC     |
| <i>Sod2</i> (ENSRNOT00000025794)                    | +738 F   | GT'TTGCAAGAAGTGAAGC       |
|                                                     | +801 R   | ACTACAAAACACCCACCA        |
| <i>Glx</i> (ENSRNOT00000016372)                     | +262 F   | CGGAGCAAGAACAGTTCCTCGG    |
|                                                     | +331 R   | GGAGAGTAGATCACTGCATCCGCC  |
| <i>Aif1</i> (ENSRNOT00000001135)                    | +144 F   | CTGAAAGCCCAACAGGAAGAGA    |
|                                                     | +207 R   | ACTTGGGATCATCGAGGAAGTG    |
| <i>C4a</i> (ENSRNOT00000086027)                     | +902 F   | AGCAGGGGAAGAAGTCTT        |
|                                                     | +979 R   | AGATGGAGATGTGAGTCTGG      |
| <i>C4b</i> (ENSRNOT00000031704)                     | +517 F   | ACGGTCACAGTAGAGAACTC      |
|                                                     | +592 R   | CTGTGAAGATGGATGTGG        |
| <i>Casp3</i> (ENSRNOT00000014095)                   | +506 F   | TCTGACTGGAAAGCCGAAACTCTTC |
|                                                     | +588 R   | TTCCACTGTCTGTCTCAATACCGCA |
